# Supplementary material for: Intratumoral heterogeneity in a minority of ovarian low-grade serous carcinomas
Source: BMC Cancer. 2014 Dec 18;14:982. doi: 10.1186/1471-2407-14-982 (PMC4320586; doi:10.1186/1471-2407-14-982)
Supplement: Supplementary file 15 — Additional file 15: “Primer sequences for Sanger sequencing”. Lists primer sequences used for validation of mutations by Sanger sequencing. (XLSX 46 KB) [file 12885_2014_5198_MOESM15_ESM.xlsx]

## Sheet: Sheet1
ADDITIONAL FILE 15. PRIMER SEQUENCES FOR SANGER SEQUENCING.
Gene	Mutation (hg19)	AA Variant	Forward (F) / Reverse (R) Primer Sequences
BRAF	chr7:140,453,136 A>T	V600E	F: 51-TGTAAAACGACGGCCAGTTGCTTGCTCTGATAGGAAAATG-31
			R: 51-CAGGAAACAGCTATGACAGTAACTCAGCAGCATCTCAGG-31
BRAF	chr7:140,481,402 C>A	G469V	F: 51-TGTAAAACGACGGCC AGTCATAAGGTTTTCTTTTTCTGTTTGG-31
			R: 51-CAGGAAACAGCTATG ACATCAAAATAGTTTATTGATGCGAACA-31
KRAS	chr12:25,398,284 C>A ; chr12:25,398,285 C>G	G12V ; G12R	F: 51-TGTAAAACGACGGCCAGTAAAAGGTACTGGTGGAGTATTTGA-31
			R: 51-CAGGAAACAGCTATGACTTGAAACCCAAGGTACATTTCA-31
NRAS	chr1:115,256,529 T>C	Q61R	F: 51-TGTAAAACGACGGCCAGTATGGGCTTGAATAGTTAGATGCTTA-31
			R: 51-CAGGAAACAGCTATGACTAATATCCGCAAATGACTTGCTATT-31
SMAD4	chr18:48,591,918 C>G	R361G	F: 51-TGTAAAACGACGGCCAGTTGAAATGGATGTTCAGGTAGGA-31
			R: 51-CAGGAAACAGCTATGACCATGGGAAAACATAACCTTGAA-31
